# Supplementary material for: Deep evaluation of the evolutionary history of the Heat Shock Factor (HSF) gene family and its expansion pattern in seed plants
Source: PeerJ journal article supplement (doi:10.7717/peerj.13603), 2022-08-09

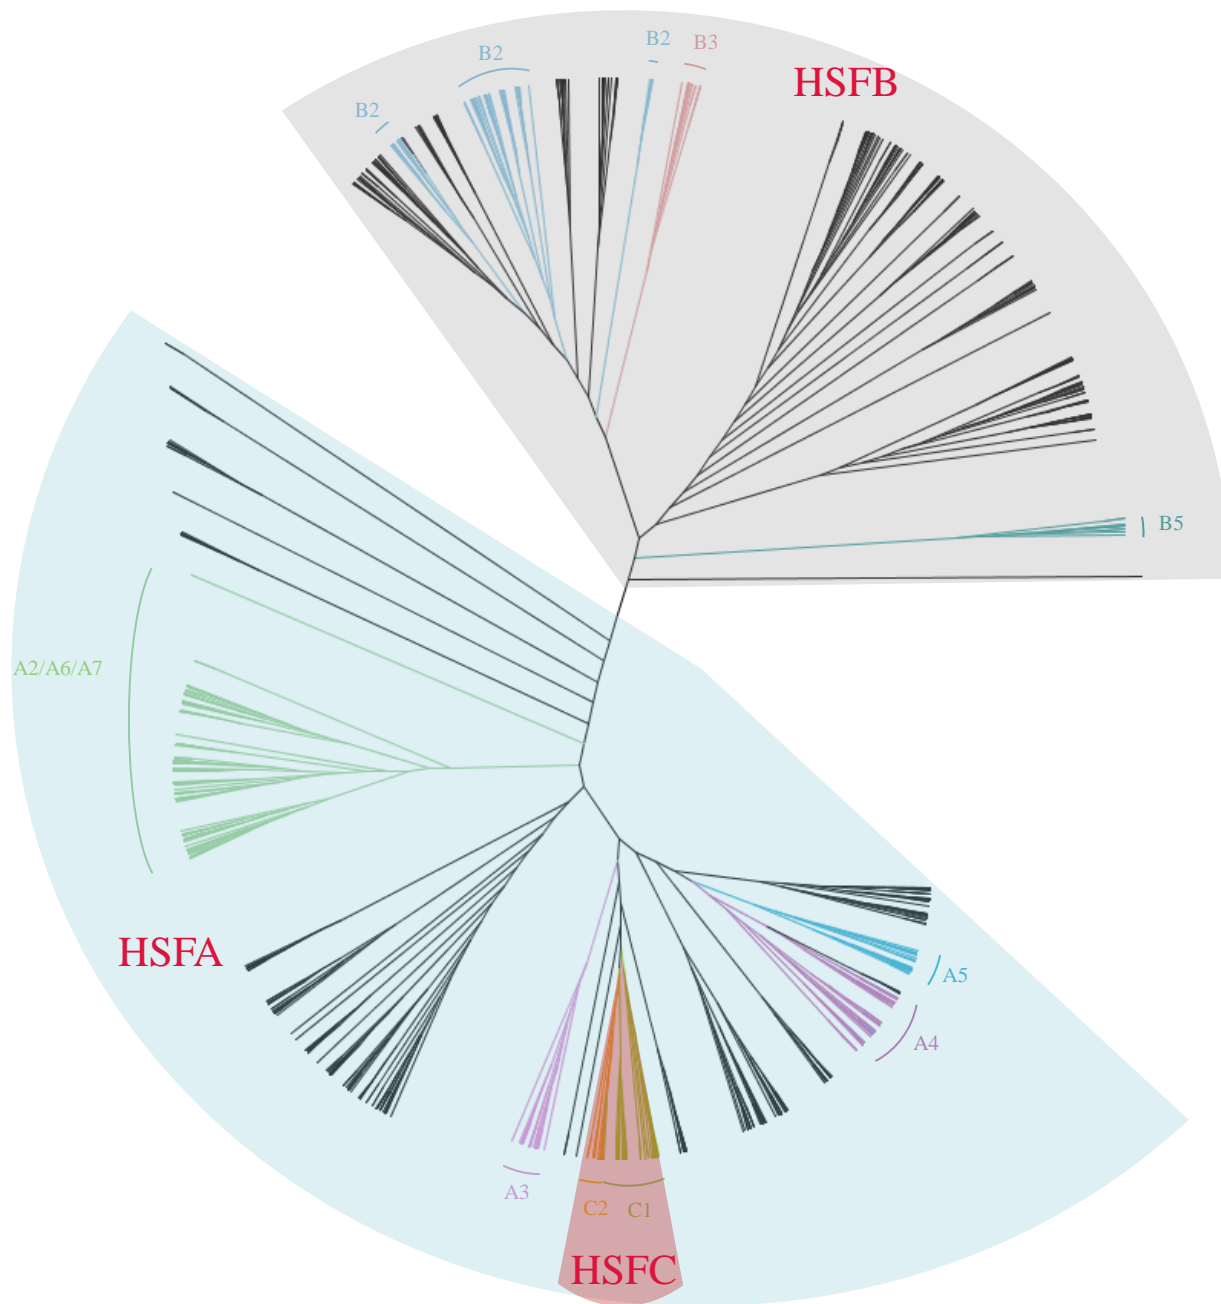

Supplement: Fig_S4.pdf [file Fig_S4.pdf]
